# Supplementary material for: A subcortical circuit linking the cerebellum to the basal ganglia engaged in vocal learning
Source: eLife journal article supplement (doi:10.7554/elife.32167), 2018-07-25
Supplement: supp [file elife-32167-supp-v1.zip]

Archive with 9 entries (9 files):
- elife_poa_e32167_Figure_6_figure_supplement_2.tif
- elife_poa_e32167_Transparent_Reporting_File.pdf
- elife_poa_e32167_Figure_2_source_data_1.zip
- elife_poa_e32167_Figure_7_figure_supplement_3_source_data_1.zip
- elife_poa_e32167_Figure_6_figure_supplement_1.tif
- elife_poa_e32167_Figure_7_figure_supplement_1.tif
- elife_poa_e32167_Figure_1_figure_supplement_1.tif
- elife_poa_e32167_Figure_6_figure_supplement_3.tif
- elife_poa_e32167_Figure_7_figure_supplement_2.tif
