# Supplementary figures and images for: A subcortical circuit linking the cerebellum to the basal ganglia engaged in vocal learning
Source: eLife journal article supplement (doi:10.7554/elife.32167), 2018-07-25

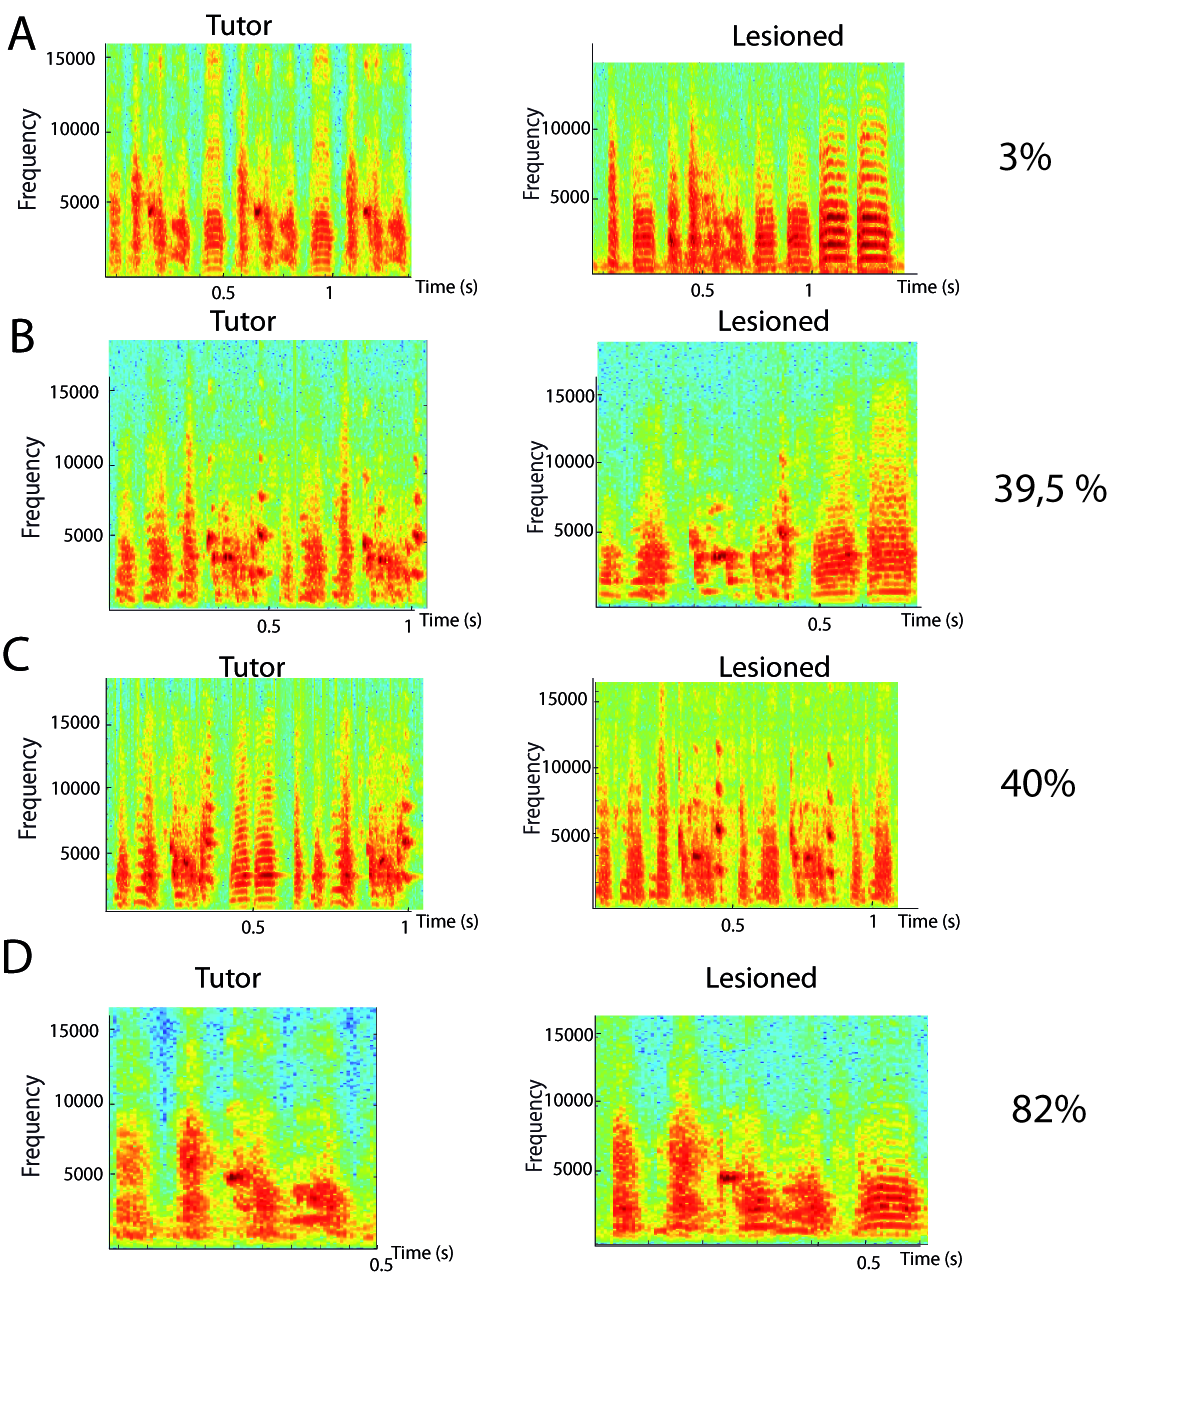

Supplement: supp [file elife-32167-supp-v1.zip › elife_poa_e32167_Figure_6_figure_supplement_2.tif]

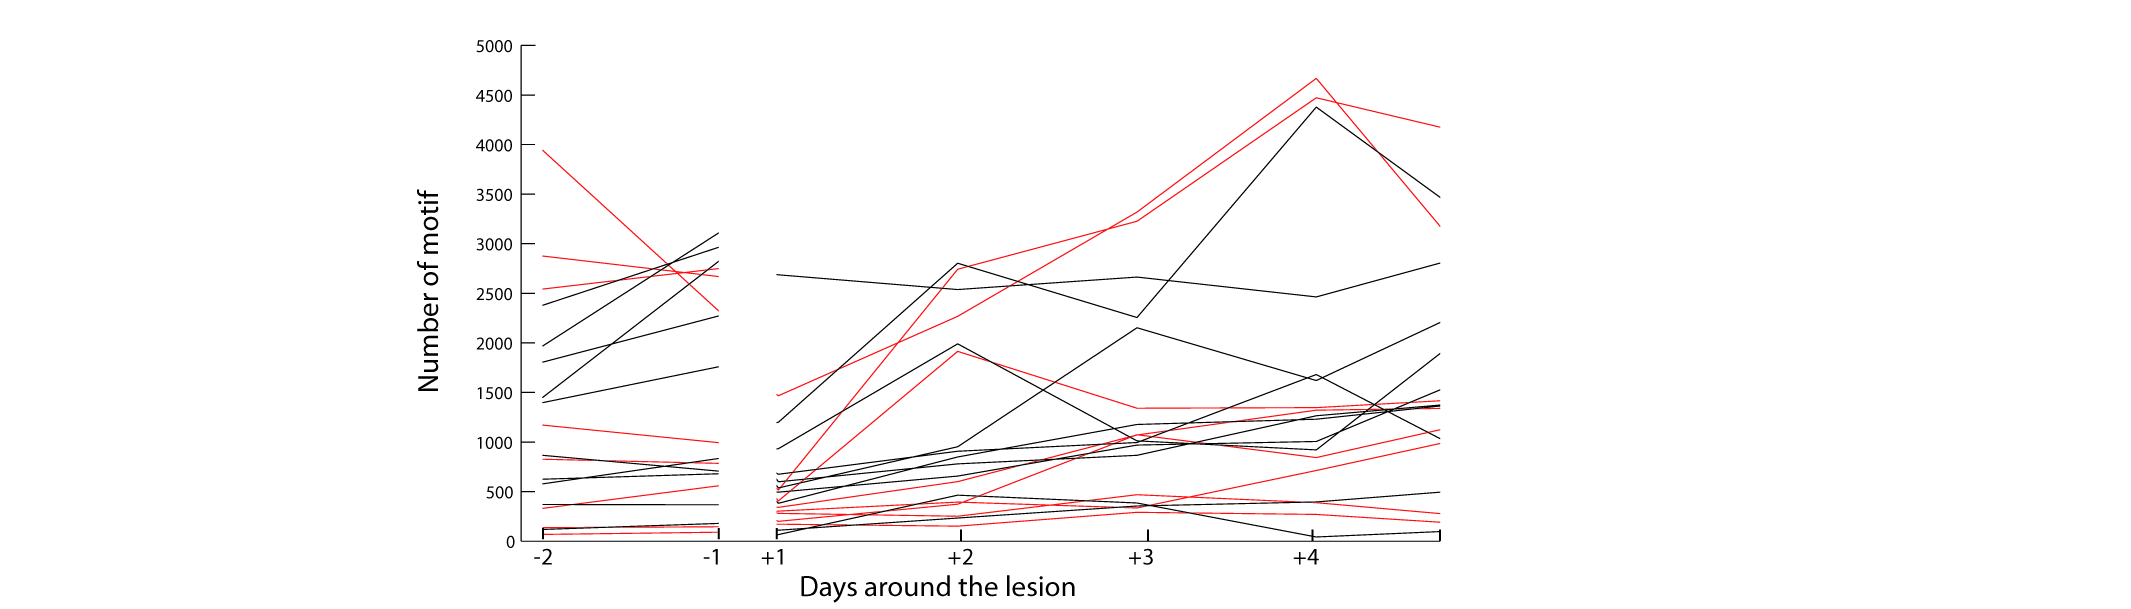

Supplement: supp [file elife-32167-supp-v1.zip › elife_poa_e32167_Figure_6_figure_supplement_1.tif]

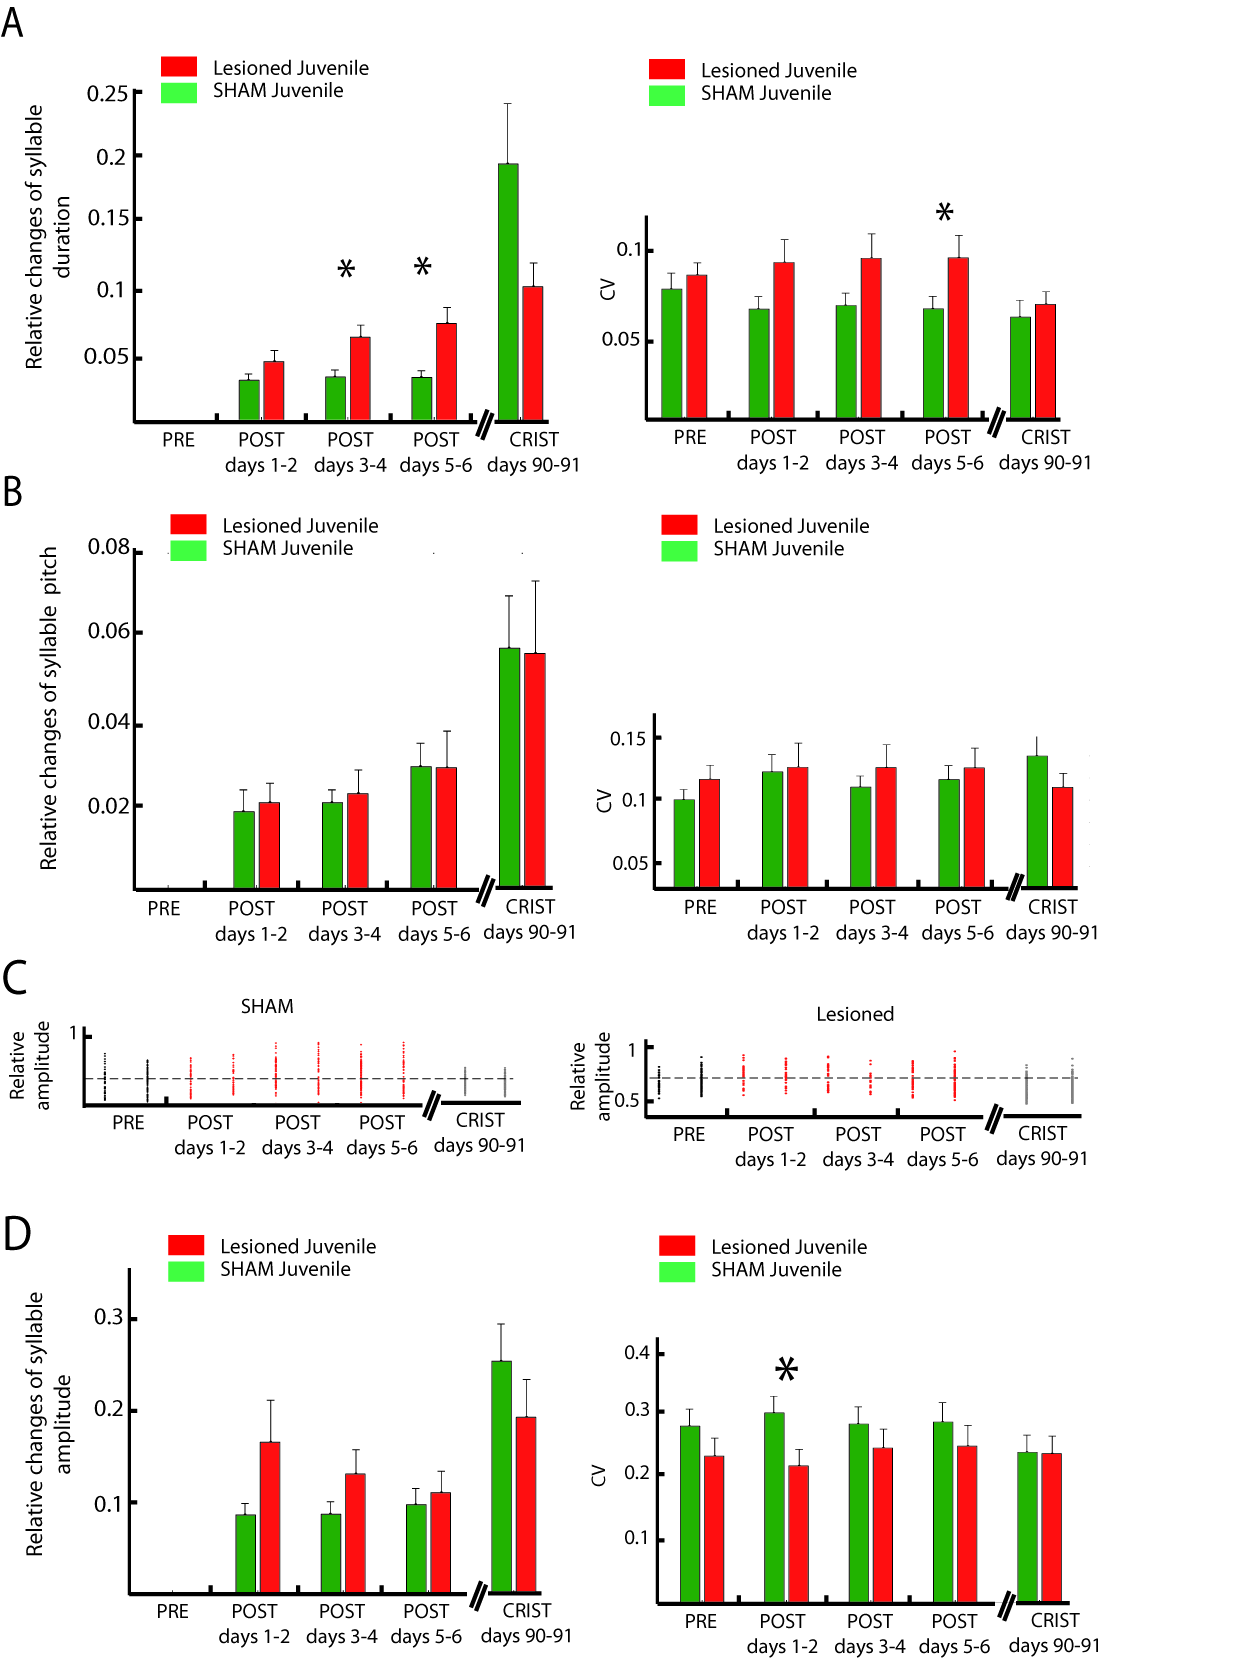

Supplement: supp [file elife-32167-supp-v1.zip › elife_poa_e32167_Figure_7_figure_supplement_1.tif]

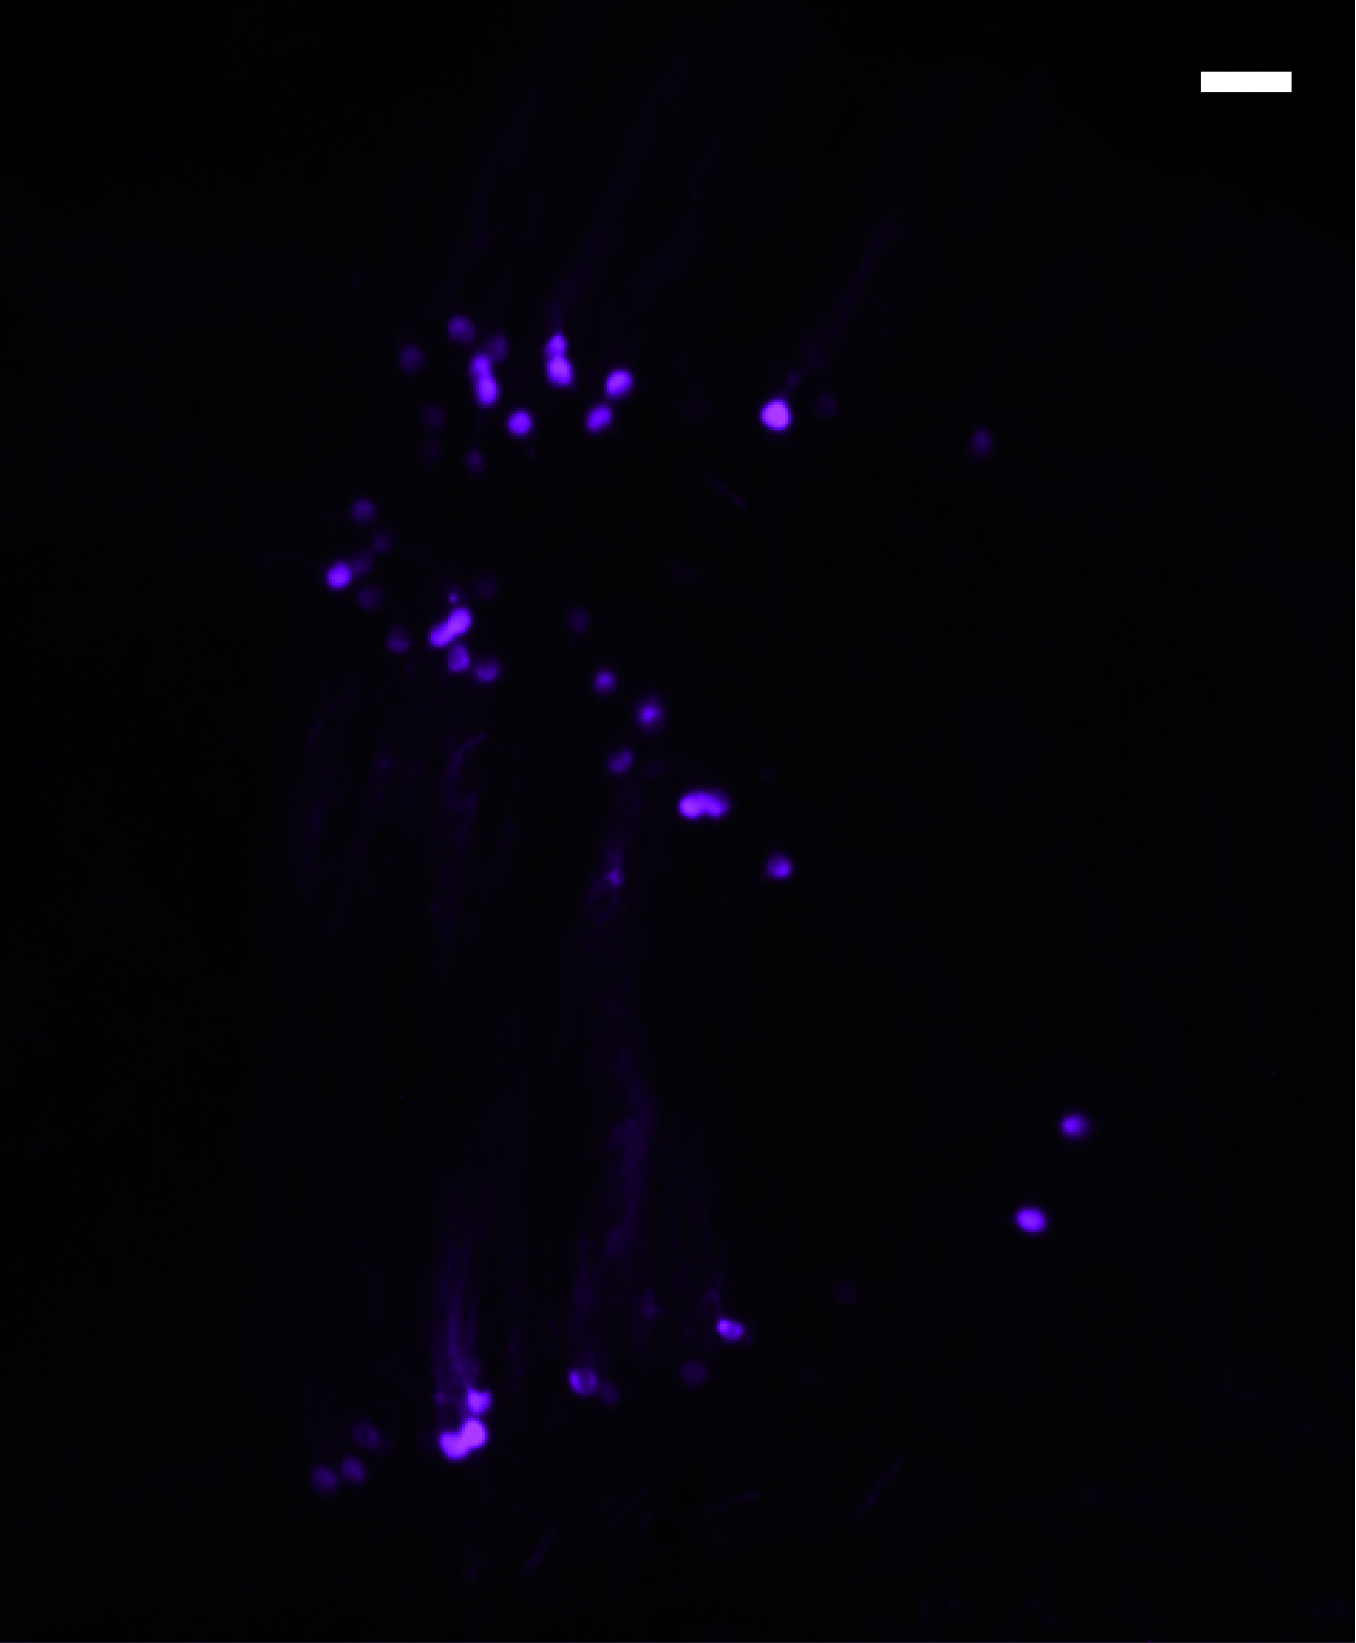

Supplement: supp [file elife-32167-supp-v1.zip › elife_poa_e32167_Figure_1_figure_supplement_1.tif]

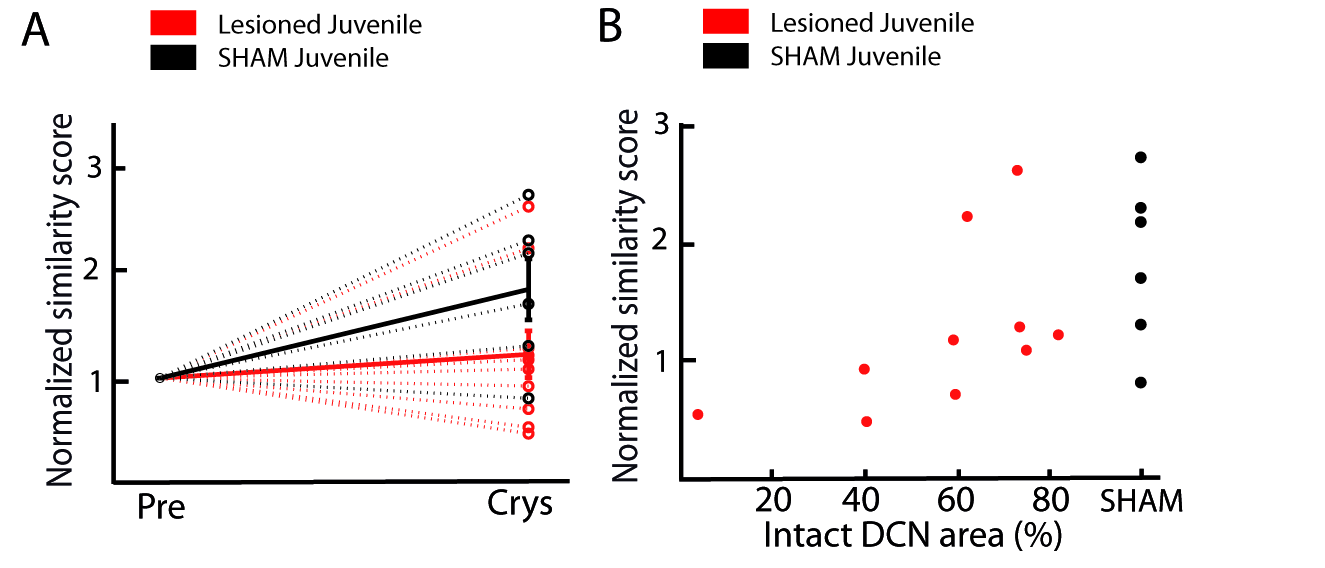

Supplement: supp [file elife-32167-supp-v1.zip › elife_poa_e32167_Figure_6_figure_supplement_3.tif]

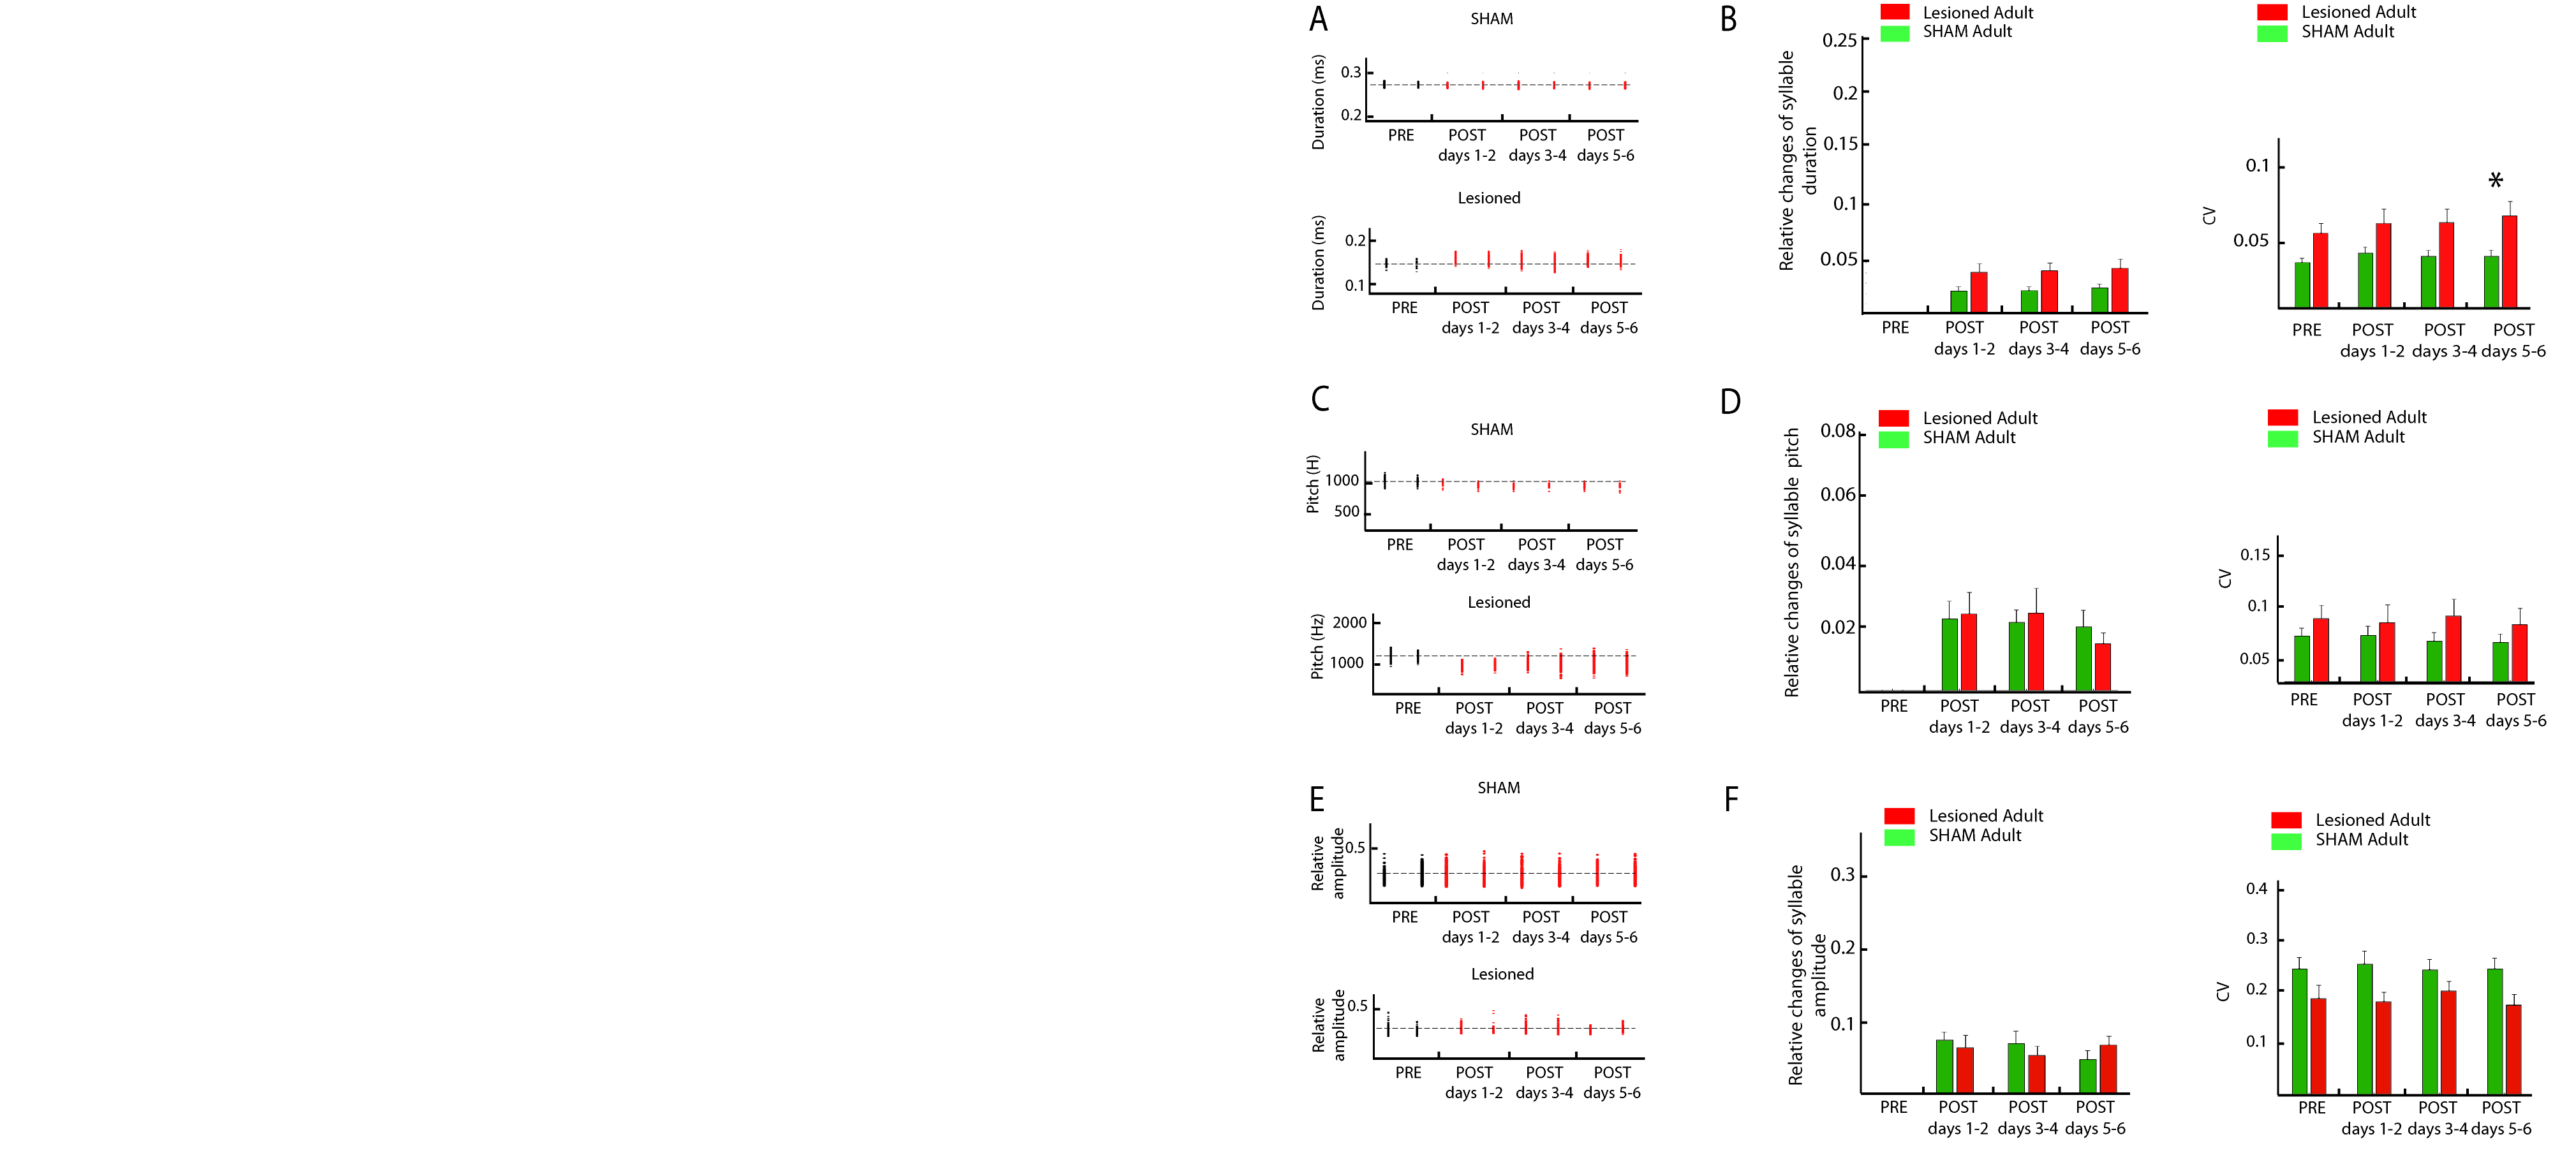

Supplement: supp [file elife-32167-supp-v1.zip › elife_poa_e32167_Figure_7_figure_supplement_2.tif]
